# Supplementary material for: Reversible mechanochromic studies on AIE-inspired smart materials and their applications in HCHO sensing
Source: Royal Society of Chemistry journal article supplement (doi:10.1039/d2dt00264g), 2022-01-01
Supplement: d2dt00264g1.pdf [file d2dt00264g1.pdf]

# **Reversible mechanochromic studies on AIE-inspired Smart materials and applications on sensing**

Huijun Li\*, Yanan Wang, Zhouqing Xu\*

Department of Chemistry and Chemical Engineering, Henan Polytechnic University,

Jiaozuo, Henan 454000, China, [lihuijunxgy@hpu.edu.cn](mailto:lihuijunxgy@hpu.edu.cn); [zhqxu@hpu.edu.cn](mailto:zhqxu@hpu.edu.cn).

## Materials Characterization Section

**Table S1.** Crystal data for **HPU-21**.

| <b>Complex</b>                                  | <b>HPU-21</b>                                                                  |
|-------------------------------------------------|--------------------------------------------------------------------------------|
| Formula                                         | C <sub>80</sub> H <sub>87</sub> N <sub>5</sub> O <sub>26</sub> Zn <sub>4</sub> |
| formula weight, fw                              | 1796.02                                                                        |
| Temperature, <i>T</i> [K]                       | 173.00                                                                         |
| crystal system                                  | <i>triclinic</i>                                                               |
| space group                                     | <i>P-1</i>                                                                     |
| a [Å]                                           | 15.4741(12)                                                                    |
| b [Å]                                           | 15.5050(12)                                                                    |
| c [Å]                                           | 18.4963(15)                                                                    |
| α [°]                                           | 68.944(4)                                                                      |
| β [°]                                           | 82.918(4)                                                                      |
| γ [°]                                           | 75.554(4)                                                                      |
| V [Å <sup>3</sup> ]                             | 4007.7(6)                                                                      |
| Z                                               | 2                                                                              |
| ρ [g cm <sup>-3</sup> ]                         | 1.488                                                                          |
| μ [mm <sup>-1</sup> ]                           | 1.345                                                                          |
| θ range                                         | 2.228-52.982                                                                   |
| F(000)                                          | 1860                                                                           |
| goodness-of-fit, GOF                            | 1.037                                                                          |
| <i>R</i> <sub>1</sub> <sup>a</sup> [I > 2σ (I)] | 0.0784                                                                         |
| w <i>R</i> <sub>2</sub> <sup>b</sup> (all data) | 0.2348                                                                         |

$${}^a R_1 = \frac{\sum (|F_o| - |F_c|)}{\sum |F_o|}, \quad {}^b wR_2 = \left[ \frac{\sum (|F_o|^2 - |F_c|^2)^2}{\sum |F_o|^2} \right]^{1/2}.$$

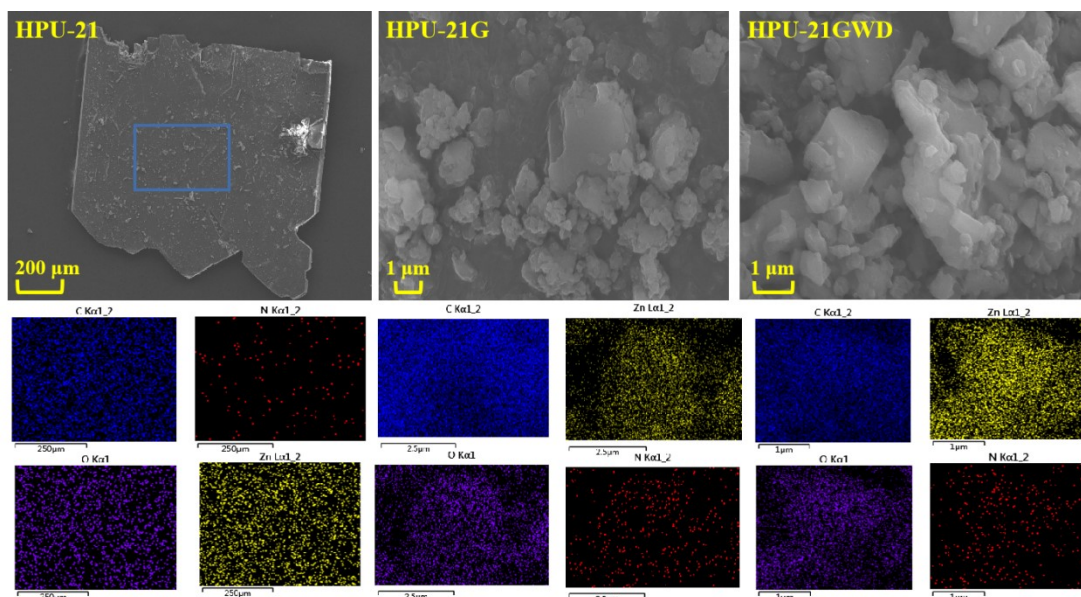

**Figure S1.** SEM images of cross-sectional morphology of **HPU-21** crystal sample, **HPU-21G** and **HPU-21GWD** disk-like micro/nanosheets obtained.

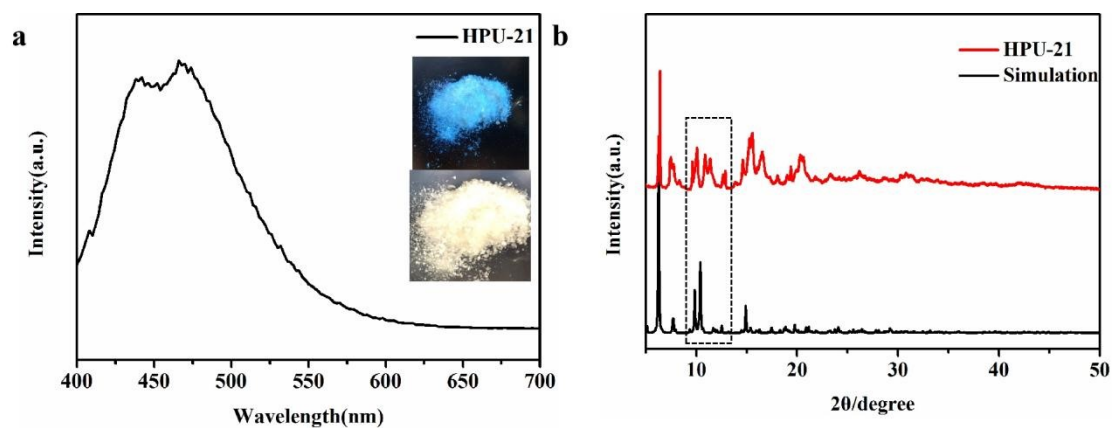

**Figure S2.** **a)** The emission spectrum of **HPU-21** (Inset is the picture of the crystal under sunlight and ultraviolet light); **b)** The XRD spectrum of the synthesized and the simulated **HPU-21**.

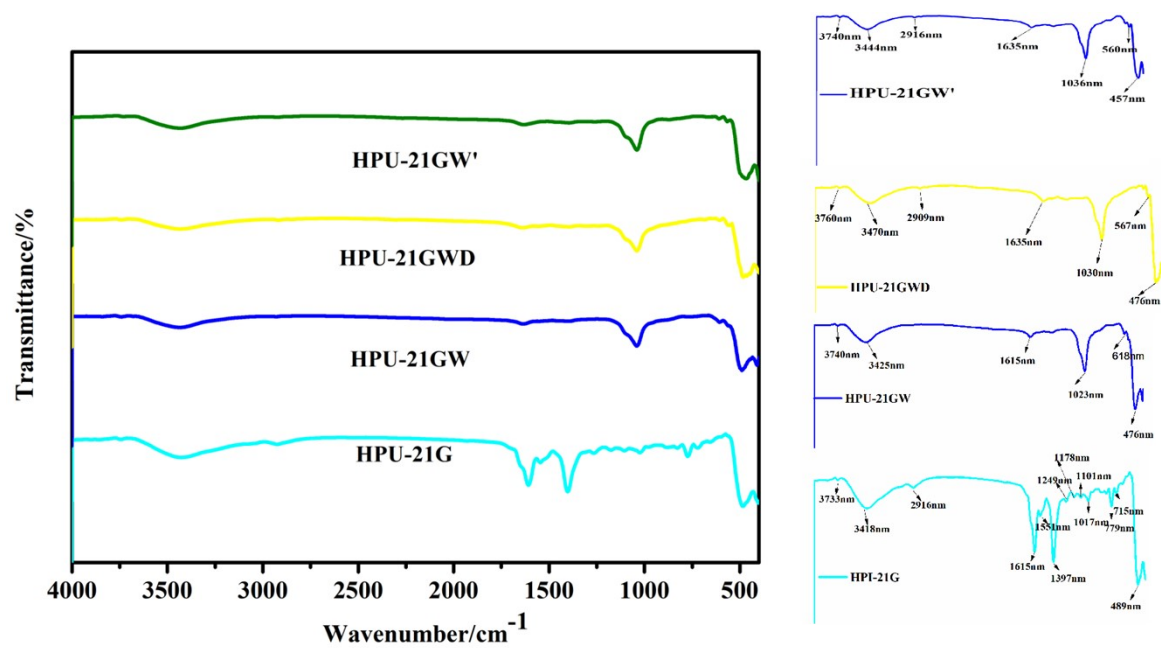

Figure S3. In-situ infrared spectra of HPU-21G, HPU-21GW, HPU-21GWD, and HPU-21GW'.

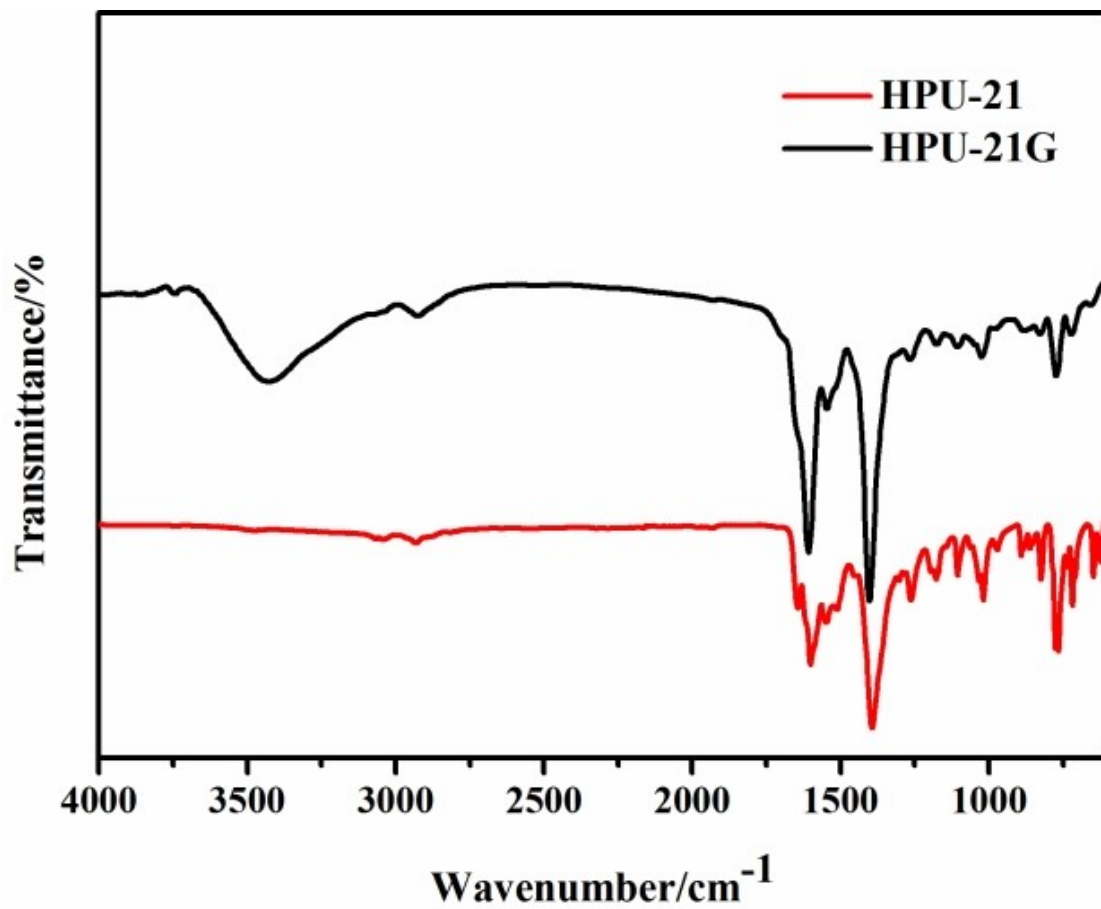

Figure S4. Infrared spectra of HPU-21 and HPU-21G.

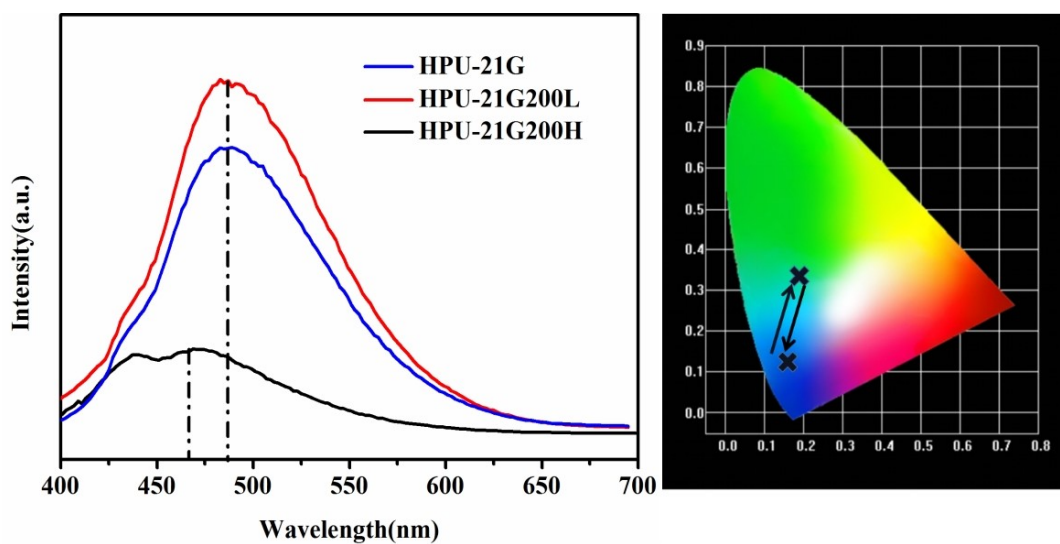

**Figure S5.** Emission spectra and CIE diagrams of HPU-21G, HPU-21G200H and HPU-21G200L.

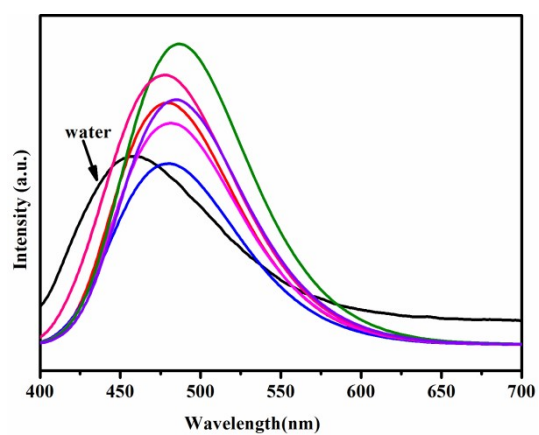

**Figure S6.** The fluorescence spectra of HPU-21G in different solvents.

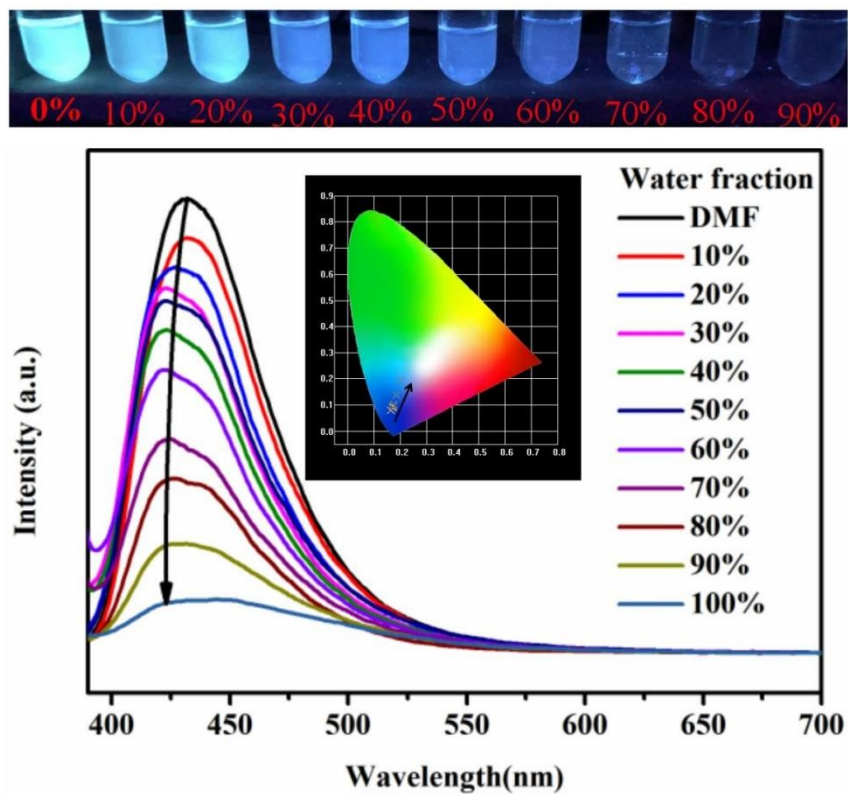

**Figure S7.** The fluorescence spectra of HPU-21G in DMF with different water contents (inset: the corresponding diagram of CIE change).

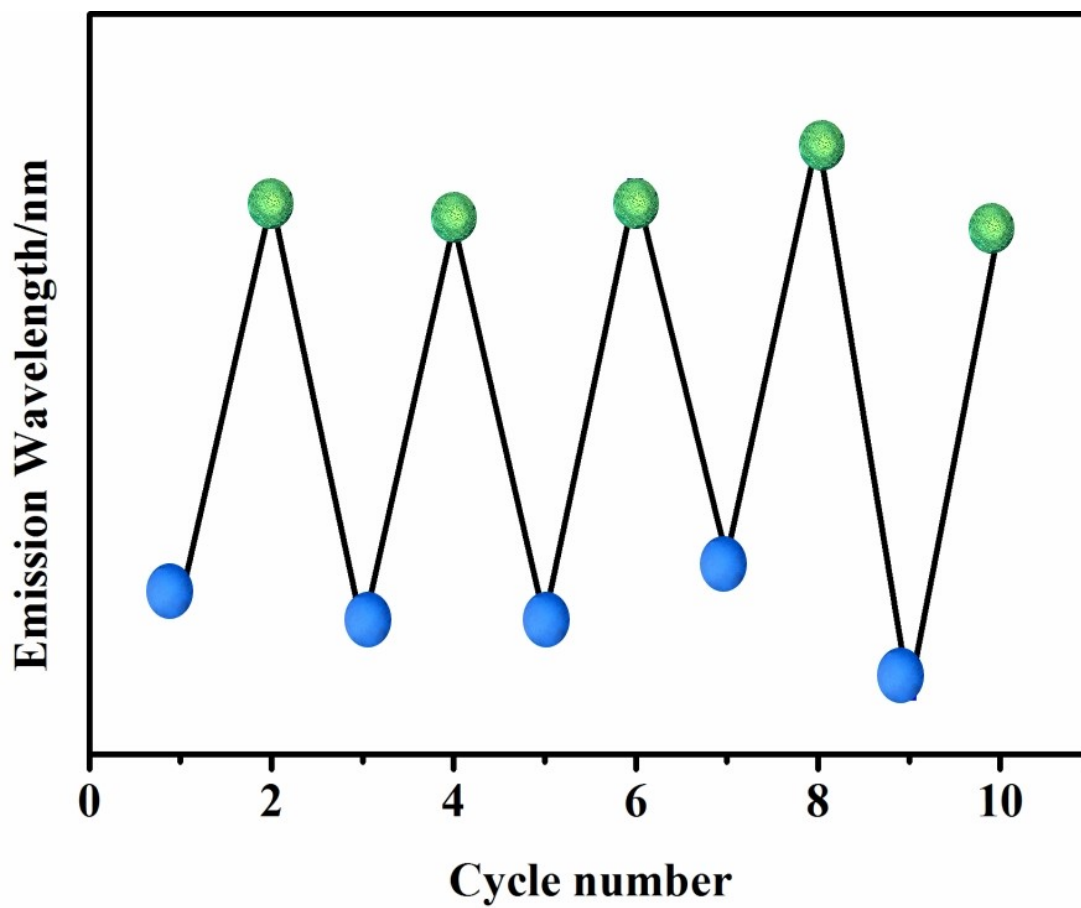

**Figure S8.** Reversible variation of the maximum emission intensity (437 and 496 nm) for **HPU-21G** under alternate treatment of wetting and air-drying in room temperature.

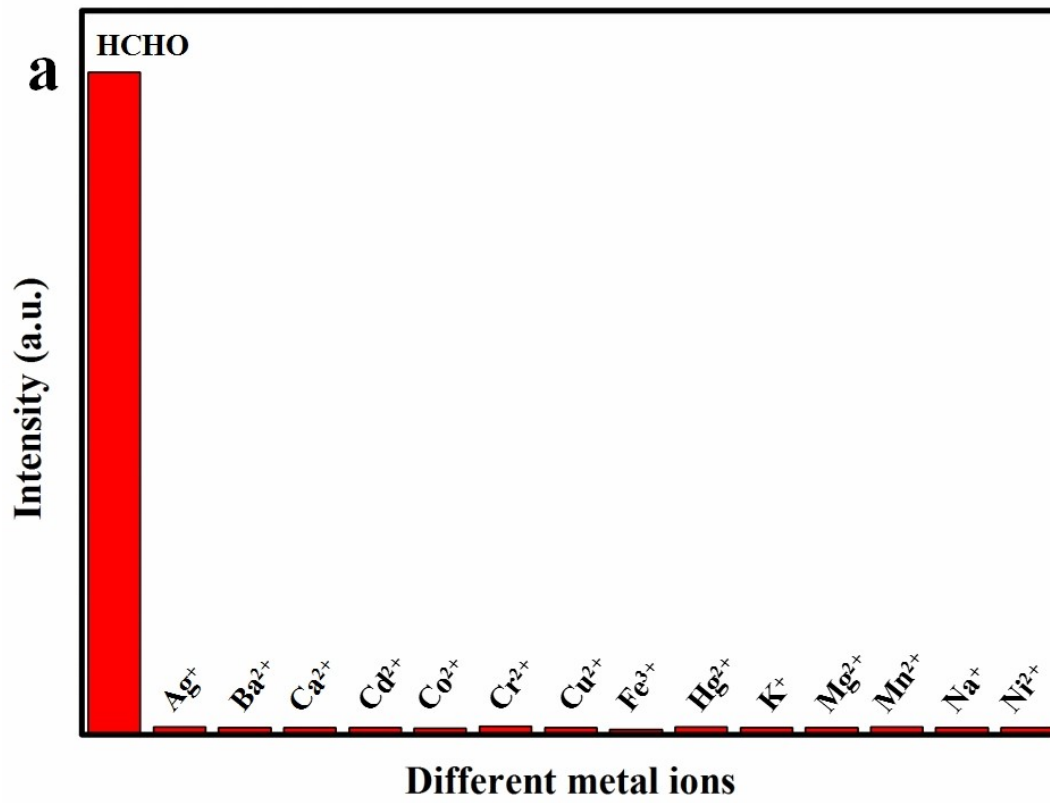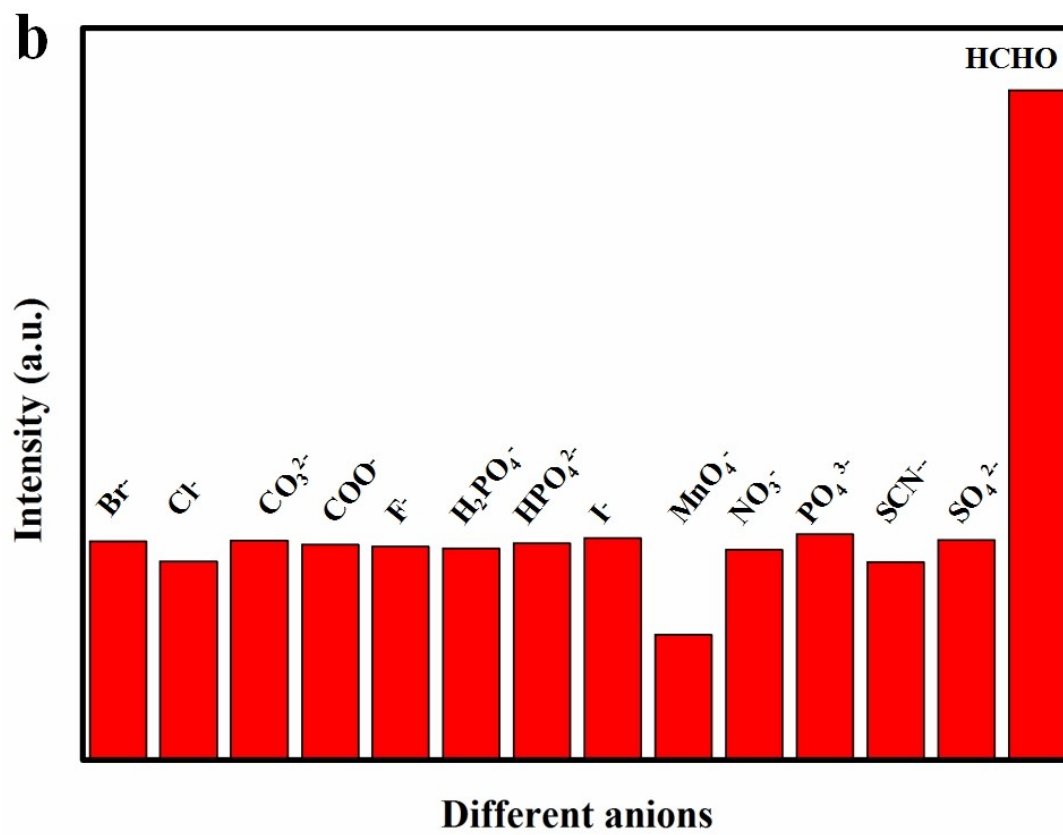



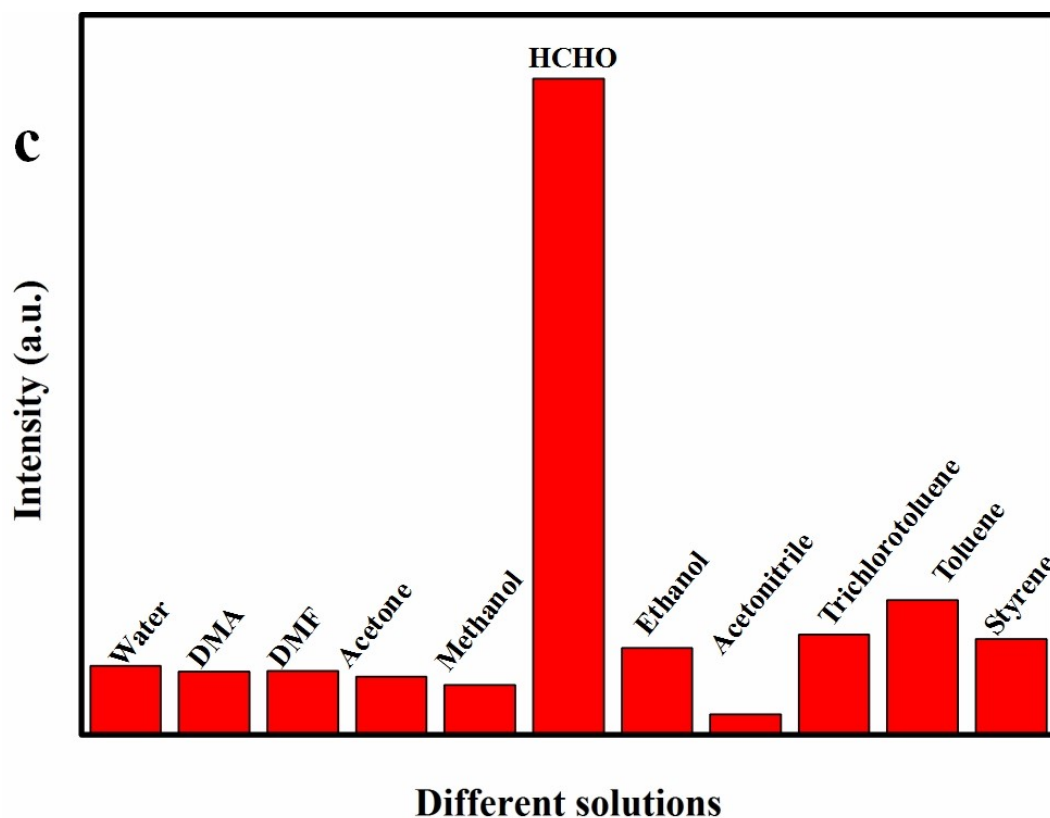

**Figure S9.** The comparison of the fluorescence intensity of the crystal suspension agent in different solvents and ions.

**Table S2.** Comparison of HCHO detection limits of different fluorescent probes.

| Fluorescent materials                                                                  | Detection limits ( $\mu\text{M}$ ) | Ref. |
|----------------------------------------------------------------------------------------|------------------------------------|------|
| Eu/Zr-MOF                                                                              | 0.2 ppm                            | 1    |
| $[(\text{C}_4\text{H}_9)_4\text{N}]_4\text{H}[\text{PMo}_{10}\text{V}_2\text{O}_{40}]$ | 0.2 ppm                            | 2    |
| $\text{Co}_5$ -based MOF                                                               | 10 ppm                             | 3    |
| MIL-101(Cr)                                                                            | 1.79 ppm                           | 4    |
| MPIPA                                                                                  | $0.32\mu\text{M}$                  | 5    |

- 1 C. M. Li, J. P. Huang, H. L. Zhu, L. L. Liu, Y. M. Feng, G. Hu and X. B. Yu, *Sens. Actuators B: Chem.*, 2017, **253**, 275-282.
- 2 M. I. S. Verissimo, J. A. F. Gamelas, A. J. S. Fernandes, D. V. Evtuguin and M. T. S. R. Gomes, *Food Chem.*, 2020, **318**, 126461.
- 3 W. Zhou, Y.-P. Wu, J. Zhao, W.-W. Dong, X.-Q. Qiao, D.-F. Hou, X. H. Bu and D.-S. Li, *Inorg. Chem.*, 2017, **56**, 14111-14117.
- 4 E. Haghghi and S. Zeinali, *Microporous Mesoporous Mater.*, 2020, **300**,

110065.

- 5 T. Gao, X. Cao, A. Bi, J. Dong, S. Huang, X. Huang, S. Wen and W. Zeng,  
*Sens. Actuators B: Chem.*, 2018, **273**, 1139-1145.
